# Supplementary material for: Identification of high-risk patients for ADR induced by traditional Chinese medicine injection: a nested case-control study
Source: PubMed Central journal article supplement (PMC6853959; doi:10.1038/s41598-019-53267-2), 2019-11-13
Supplement: 41598_2019_53267_MOESM1_ESM.pdf [file 41598_2019_53267_MOESM1_ESM.pdf]

**Identification of high-risk patients for ADR induced by traditional Chinese  
medicine injection: a nested case-control study**

Cheng Jiang,<sup>1, #</sup> Jie Shen,<sup>2, #</sup> Dan Shou,<sup>3</sup> Nani Wang,<sup>3</sup> Jing Jing,<sup>4</sup> Guodi Zhang,<sup>4</sup> Jing  
Gu,<sup>4</sup> Yunlong Tian,<sup>5</sup> Caihua Sun,<sup>2</sup> Jiaqi He,<sup>2</sup> Jiaqi Ma,<sup>6</sup> Xiaojun Wang,<sup>1, \*</sup> Gonghua  
Li,<sup>1, \*\*</sup>

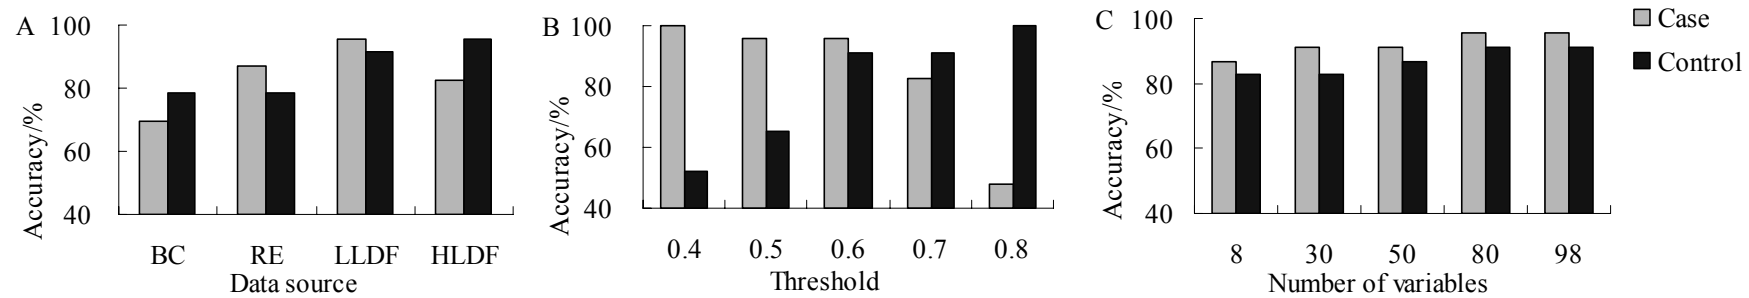

**Figure s1.** Recognition results of models in validation cohort. **(A)** Models based on different data sources. (BC: Basic characteristic; RE: Routine examination) **(B)** Models with different thresholds. **(C)** Models based on different number of variables.

| TCMI names           | Number | Herbal species                                                                          | Major active compounds                                                                                           | References |
|----------------------|--------|-----------------------------------------------------------------------------------------|------------------------------------------------------------------------------------------------------------------|------------|
| Shenmai injection    | 82     | <i>Radix Ginseng Rubra</i><br><i>Radix Ophiopogonis</i>                                 | Ginsenoside Re, Rg1, Rf, et al.<br>Ophiopogonin D, ophiopogonanone A,<br>2'-Hydroxyophiopogonone A, et al.       | 1-4        |
| Kudiezi injection    | 10     | <i>Ixeridium Sonchifolium</i>                                                           | Sonchifoliasolide M, sonchifoliactone C, ixerisoside C, et al.                                                   | 5-7        |
| Shuxuening injection | 8      | <i>Ginkgo Folium</i>                                                                    | Rutin, isoquercitrin, kaempferol, et al.                                                                         | 8-11       |
| Danhong injection    | 7      | <i>Radix Salviae</i><br><i>Carthami Flos</i>                                            | Protocatechuic aldehyde, tanshinol, salvianolic acid A, et al.<br>Syringin, quercimeritrin, caffeic acid, et al. | 12-14      |
| Xiaoaipin injection  | 7      | <i>Marsdenia Tenacissima</i>                                                            | Tenacigenin A, B, tenacissoside F, et al.                                                                        | 15         |
| Kangai injection     | 6      | <i>Hedysarum Multijugum</i><br><i>Panax Ginseng</i><br><i>Sophorae Flavescens Radix</i> | Astragaloside IV, calycosin, et al.<br>Ginsenoside Re, Rg1, Rf, et al.<br>Oxymatrine                             | 16         |
| Kanglaite injection  | 3      | <i>Coicis Semen</i>                                                                     | Triolein, coixenolide, coixol, et al.                                                                            | 17         |

**Table s1.** Herbal species and major active compounds of each TCMI

| Systems / organizations        | Total number of cases* | Main manifestations (number of cases*)                              |
|--------------------------------|------------------------|---------------------------------------------------------------------|
| Systemic injury                | 56                     | Hot flush (35), shiver (11), fever (6), acratia (3), chest pain (1) |
| Respiratory system damage      | 54                     | Chest tightness (33), dyspnea (21)                                  |
| Skin lesion                    | 37                     | Erythra(20), pruritus (13), hypethidrosis (4)                       |
| Gastrointestinal system damage | 21                     | Sicchasia (11), vomit (8), abdominal pain (2)                       |
| Nervous system damage          | 8                      | Giddy (5), headache (2), paresthesia (1)                            |
| Cardiovascular system damage   | 5                      | Hypertension (3), phlebitis (2)                                     |

**Table s2.** Main ADR manifestations in included cases

\* There may be several manifestations occurred simultaneously in one ADR case.

| Classification of seriousness                                                                    | Number of cases | Constituent ratio/% |
|--------------------------------------------------------------------------------------------------|-----------------|---------------------|
| Class I ADR are deadly or life-threatening.                                                      | 4               | 3.25                |
| Class II Patients have pathologic and physiologic changes.                                       | 3               | 2.44                |
| Class III Patients cannot endure the ADR and must be given a lower dose or withdrawn from drugs. | 20              | 16.26               |
| Class IV Patients can endure the ADR.                                                            | 96              | 78.05               |

**Table s3.** ADR seriousness in included cases

| Classification of relevance | Point 1 <sup>*</sup>                                                                                            | Point 2 <sup>+</sup> | Point 3 <sup>&amp;</sup> | Point 4 <sup>#</sup> | Point 5 <sup>\$</sup> |
|-----------------------------|-----------------------------------------------------------------------------------------------------------------|----------------------|--------------------------|----------------------|-----------------------|
| Definite                    | Yes                                                                                                             | Yes                  | Yes                      | Yes                  | Yes                   |
| Probable                    | Yes                                                                                                             | Yes                  | Yes                      | Uncertainty          | Yes                   |
| Possible                    | Yes                                                                                                             | Yes                  | Uncertainty              | Uncertainty          | Uncertainty           |
| Unlikely                    | No                                                                                                              | No                   | Uncertainty              | Uncertainty          | Uncertainty           |
| Pending                     | There are missing contents. The evaluation can be completed when the supplementary specifications are provided. |                      |                          |                      |                       |
| Unassessable                | Many items are unavailable. The relationship is unassessable since the missing items can not be supplemented.   |                      |                          |                      |                       |

**Table s4.** Relevance evaluation method of the national ADR monitoring center

\*: The temporal relation between medication and ADR's occurrence was reasonable;

+: The clinical symptoms were coincided with the known ADR profile;

&: The ADR was relieved or vanished after decreasing dosage or drug withdrawal;

#: The ADR occurred again when drug was re-administered;

\$. The probability of ADR caused by concomitant medications, disease progression or other treatment could be excluded.

| Variable categories  |                                        | Variable NO.: variable names (variable descriptions)                                                                                                                                                                                                                                                                                                                                                                                                                                                                                                                                                                                                                                                                                                                                                                                                                                                                                                                                                                                                                                                                                                                                                                                                                                                 |
|----------------------|----------------------------------------|------------------------------------------------------------------------------------------------------------------------------------------------------------------------------------------------------------------------------------------------------------------------------------------------------------------------------------------------------------------------------------------------------------------------------------------------------------------------------------------------------------------------------------------------------------------------------------------------------------------------------------------------------------------------------------------------------------------------------------------------------------------------------------------------------------------------------------------------------------------------------------------------------------------------------------------------------------------------------------------------------------------------------------------------------------------------------------------------------------------------------------------------------------------------------------------------------------------------------------------------------------------------------------------------------|
| Basic characteristic | Demographic                            | 1: Gender (male: 1, female: 0); 2: Age (year); 3: Body weight (kg); 4: Height (cm);                                                                                                                                                                                                                                                                                                                                                                                                                                                                                                                                                                                                                                                                                                                                                                                                                                                                                                                                                                                                                                                                                                                                                                                                                  |
|                      | Comorbiditie<br>Previous history       | 5: Hypertension (yes: 1, no: 0); 6: Diabetes (yes: 1, no: 0); 7: Hepatitis (yes: 1, no: 0); 8: Tuberculosis (yes: 1, no: 0); 9: History of trauma surgery (yes: 1, no: 0); 10: History of drug allergy (yes: 1, no: 0); 11: History of food allergy (yes: 1, no: 0); 12: History of blood transfusion (yes: 1, no: 0);                                                                                                                                                                                                                                                                                                                                                                                                                                                                                                                                                                                                                                                                                                                                                                                                                                                                                                                                                                               |
| Routine examination  | Urine flow<br>analysis                 | 13: Urinary sediment cast (/μL); 14: Urinary sediment conductivity (mS/cm); 15: Urinary sediment epithelial cell (/μL); 16: Urinary sediment mucus (/μL); 17: Urinary sediment path cast (/μL); 18: Urine pH; 19: Urinary sediment red blood cell (/μL); 20: Urinary sediment small round cell (/μL); 21: Urinary sediment white blood cell (/μL); 22: Urinary sediment yeast-like fungi (/μL); 23: Urine white blood cell (negative: 0, +: 1, ++: 2); 24: Urine specific gravity; 25: Urine bilirubin (negative: 0, +: 1, ++: 2); 26: Urine protein (negative: 0, +: 1, ++: 2); 27: Urobilinogen (negative: 0, +: 1, ++: 2); 28: Urine glucose (negative: 0, +: 1, ++: 2); 29: Urine acetone bodies (negative: 0, +: 1, ++: 2); 30: Urine nitrous acid (negative: 0, +: 1, ++: 2); 31: Hematuria (negative: 0, +: 1, ++: 2);                                                                                                                                                                                                                                                                                                                                                                                                                                                                        |
|                      | Blood routine<br>examination           | 32: White blood cell count (E+09/L); 33: Monocyte count (E+09/L); 34: Monocytes ratio (%); 35: Red blood cell distribution width (%); 36: Red blood cell count (E+12/L); 37: Red blood cell hematocrit (%); 38: Lymphocyte count (E+09/L); 39: Lymphocyte ratio (%); 40: Mean corpuscular volume (fL); 41: Mean corpuscular hemoglobin (pg); 42: Mean corpuscular hemoglobin concentration (g/L); 43: Mean platelet volume (fL); 44: Basophilic granulocyte count (E+09/L); 45: Basophilic granulocyte ratio (%); 46: Eosinophilic granulocyte count (E+09/L); 47: Eosinophilic granulocyte ratio (%); 48: Hemoglobin (g/L); 49: Platelet distribution width (%); 50: Blood platelet count (E+09/L); 51: Thrombocytocrit (%); 52: Neutrophil count (E+09/L); 53: Neutrophil ratio (%);                                                                                                                                                                                                                                                                                                                                                                                                                                                                                                               |
|                      | Biochemical<br>series examination      | 54: Aspertate aminotransferase/alanine aminotransferase ; 55: b-hydroxybutyric acid (mmol/L); 56: Albumin (g/L); 57: Albumin/globulin; 58: High-sensitivity C-reactive protein (mg/L); 59: Cholinesterase (U/L); 60: Low density lipoprotein (mmol/L); 61: Amylase (U/L); 62: Glycylproline dipeptidyl aminopeptidase (U/L); 63: Triglyceride (mmol/L); 64: High-density lipoprotein (mmol/L); 65: Glutamyl transpeptidase (U/L); 66: Alanine aminotransferase (U/L); 67: Aspertate aminotransferase (U/L); 68: Serum creatinine (μmol/L); 69: Creatine kinase isoenzyme (U/L); 70: Potassium (mmol/L); 71: Indirect bilirubin (μmol/L); 72: Alkaline phosphatase (U/L); 73: Phosphorus (mmol/L); 74: Creatine phosphate kinase (U/L); 75: Chlorine (mmol/L); 76: Magnesium (mmol/L); 77: Sodium (mmol/L); 78: Urea (mmol/L); 79: Uric acid (μmol/L); 80: Glucose (mmol/L); 81: Hydroxybutyrate dehydrogenase (U/L); 82: Globulin (g/L); 83: Lactic dehydrogenase (U/L); 84: Bicarbonate (mmol/L); 85: Homocysteine (μmol/L); 86: Adenosine deaminase (U/L); 87: Apolipoprotein A (g/L); 88: Apolipoprotein B (g/L); 89: Direct bilirubin (μmol/L); 90: Total cholesterol (mmol/L); 91: Total bilirubin (μmol/L); 92: Total bile acid (μmol/L); 93: Total protein (g/L); 94: Total calcium (mmol/L); |
|                      | Coagulation<br>function<br>examination | 95: International normalized ratio; 96: Activated partial thromboplastin time (second); 97: Prothrombin time (second); 98: Fibrinogen (g/L)                                                                                                                                                                                                                                                                                                                                                                                                                                                                                                                                                                                                                                                                                                                                                                                                                                                                                                                                                                                                                                                                                                                                                          |

**Table s5.** Categories, names and descriptions of clinical information

## References:

1. Fang, X., Wang, Y. & Cheng, Y. LC/MS fingerprinting of Shenmai injection: a novel approach to quality control of herbal medicines. *J Pharmaceut Biomed* **40**, 591-597 (2006).
2. Yu, J. *et al.* Simultaneous determination and pharmacokinetics of eight ginsenosides by LC-MS/MS after intravenously infusion of 'SHENMAI' injection in dogs. *Pak J Pharm Sci* **30**, 421-427 (2017).
3. Yu, K., Ma, Y., Shao, Q., Qu, H. & Cheng, Y. Simultaneously determination of five ginsenosides in rabbit plasma using solid-phase extraction and HPLC/MS technique after intravenous administration of 'SHENMAI' injection. *J Pharmaceut Biomed* **44**, 532-539 (2007).
4. Xia, C. *et al.* Simultaneous determination of ginsenoside Rg1, Re, Rd, Rb1 and ophiopogonin D in rat plasma by liquid chromatography/electrospray ionization mass spectrometric method and its application to pharmacokinetic study of 'SHENMAI' injection. *J Chromatogr B* **862**, 72-78 (2008).
5. Shi, P. *et al.* Simultaneous Determination of Five Phenolic Acids and Four Flavonoid Glycosides in Rat Plasma Using HPLC-MS/MS and Its Application to a Pharmacokinetic Study after a Single Intravenous Administration of Kudiezi Injection. *Molecules* **24**, 64 (2018).
6. Liu, R. *et al.* Rapid screening and identification of sesquiterpene lactones in Kudiezi injection based on high-performance liquid chromatography coupled with linear ion trap-orbitrap mass spectrometry. *Chin J Nat Medicines* **16**, 150-160 (2018).
7. Yin, R. *et al.* UFLC-MS/MS method for simultaneous determination of luteolin-7-O-gentiobioside, luteolin-7-O- $\beta$ -D-glucoside and luteolin-7-O- $\beta$ -D-glucuronide in beagle dog plasma and its application to a pharmacokinetic study after administration of traditional Chinese medicinal preparation: Kudiezi injection. *J Pharmaceut Biomed* **72**, 127-133 (2013).
8. Ma, H., Li, J., An, M., Gao, X. & Chang, Y. A powerful on line ABTS-CE-DAD method to screen and quantify major antioxidants for quality control of Shuxuening Injection. *Sci Rep-Uk* **8**, 5441 (2018).
9. Lin, S. *et al.* Development and Validation of an Analytical Method for the Determination of Flavonol Glycosides in Ginkgo Leaves and ShuXueNing Injections by a Single Marker. *J Chromatogr Sci* **54**, 1041-1049 (2016).
10. Yu, S. *et al.* Integrated liquid chromatography-mass spectrometry and nuclear magnetic resonance spectra for the comprehensive characterization of various components in the Shuxuening injection. *J Chromatogr A* **1559**, 125-135 (2019).
11. Niu, Y. *et al.* Development of an on-line analytical platform to screen haptens in shuxuening injection based on high-performance liquid chromatography coupled with ion-trap multistage mass spectrometry and human serum albumin fluorescence detection. *J Chromatogr A* **1598**, 232-241 (2019).
12. Li, X. *et al.* Simultaneous determination of eight Danshen polyphenols in rat plasma and its application to a comparative pharmacokinetic study of DanHong injection and Danshen injection. *J Sep Sci* **40**, 1470-1481 (2017).
13. Liu, H. *et al.* Characterization of in vivo antioxidant constituents and dual-standard quality assessment of Danhong injection. *Biomed Chromatogr* **27**, 655-663 (2013).
14. Qi, Y. *et al.* Identification of a Quality Marker (Q-Marker) of Danhong Injection by the Zebrafish Thrombosis Model. *Molecules* **22**, 1443 (2017).
15. Gong, X. *et al.* Fingerprint Analysis of Xiaoaiping Injection and Simultaneous Determination of Its Seven Active Steroidal Components in Xiaoaiping Injection by HPLC-ELSD. *Chin J Exper Trad Med Form* **22**, 68-72 (2016).
16. Guo, Y. & Liu, Q. The Studies of Chemical Constituents of Kang'ai Injection. *Pharm Tod* **29**, 6-10 (2019).
17. Wang, B. Network Pharmacology Study of Anticancer Mechanism of Three Main Components in Kanglaite Injection. *Chin J Mod Appl Pharm* **36**, 58-63 (2019).
